# Supplementary material for: Functional Exploitation of Carob, Oat Flour, and Whey Permeate as Substrates for a Novel Kefir-Like Fermented Beverage: An Optimized Formulation
Source: MDPI journal article supplement (doi:10.3390/foods10020294), 2021-02-01

**Figure S1.** Separation by HPLC (280 nm) of microbial derivatives of phenolic acids in methanol/water-soluble extracts obtained from the unfermented mixture (A) and fermented KLB (B).

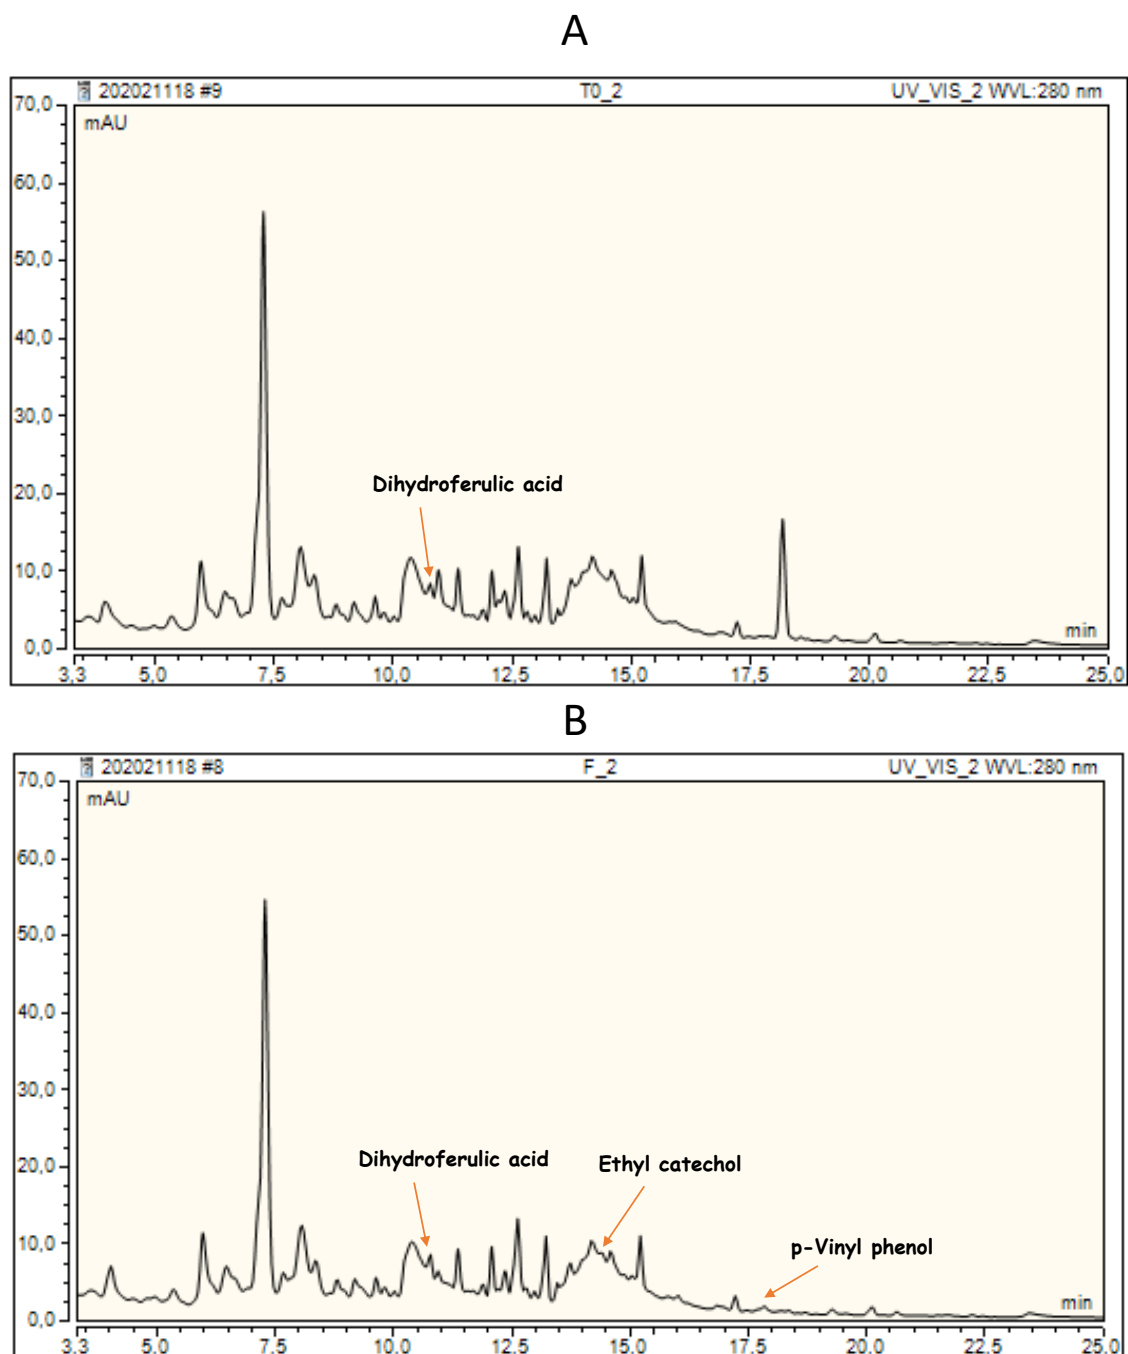

Supplement: s1 [file s1]
