# Supplementary material for: Functional Exploitation of Carob, Oat Flour, and Whey Permeate as Substrates for a Novel Kefir-Like Fermented Beverage: An Optimized Formulation
Source: MDPI journal article supplement (doi:10.3390/foods10020294), 2021-02-01
Supplement: s1 [file s1]

**Table S2.** Analysis of variance for each response (lactic acid bacteria and yeasts cell counts, pH, total titratable acidity [TTA], total phenolics content [TPC], DPPH radical scavenging activity, and overall acceptability [OA]).

| Source                                               | Sum of squares | DF | Mean squares | F-value | Signif.% |
|------------------------------------------------------|----------------|----|--------------|---------|----------|
| <b>Lactic acid bacteria cells count log (CFU/ml)</b> |                |    |              |         |          |
| <b>Model</b>                                         | 3.1541         | 5  | 0.6308       | 95.6258 | ***      |
| <b>Residual</b>                                      | 0.0462         | 7  | 0.0066       |         |          |
| <b>Lack of fit</b>                                   | 0.0218         | 3  | 0.0073       | 1.1900  | 42.0%    |
| <b>Pure error</b>                                    | 0.0244         | 4  | 0.0061       |         |          |
| <b>total</b>                                         | 3.2002         | 12 |              |         |          |

$R^2=0.986$  ; Adj- $R^2=0.975$

(\* $p < 0.05$ , \*\* $p < 0.01$ , and \*\*\* $p < 0.001$ ).

| Source                                 | Sum of squares | DF | Mean squares  | F-value   | Signif.% |
|----------------------------------------|----------------|----|---------------|-----------|----------|
| <b>Yeasts cells count (log CFU/ml)</b> |                |    |               |           |          |
| <b>Model</b>                           | 5.18015E-0001  | 5  | 1.03603E-0001 | 6598.9158 | ***      |
| <b>Residual</b>                        | 4.17591E-0002  | 7  | 5.96559E-0003 |           |          |
| <b>Lack of fit</b>                     | 4.16963E-0002  | 3  | 1.38987E-0002 | 885.2720  | ***      |
| <b>Pure error</b>                      | 6.28000E-0005  | 4  | 1.57000E-0005 |           |          |
| <b>total</b>                           | 5.59774E-0001  | 12 |               |           |          |

$R^2=0.925$  ; Adj- $R^2=0.872$

(\* $p < 0.05$ , \*\* $p < 0.01$ , and \*\*\* $p < 0.001$ ).

| Source             | Sum of squares | DF | Mean squares | F-value | Signif.% |
|--------------------|----------------|----|--------------|---------|----------|
| <b>pH</b>          |                |    |              |         |          |
| <b>Model</b>       | 0.0349         | 5  | 0.0070       | 58.0935 | **       |
| <b>Residual</b>    | 0.0056         | 7  | 0.0008       |         |          |
| <b>Lack of fit</b> | 0.0051         | 3  | 0.0017       | 14.2800 | *        |
| <b>Pure error</b>  | 0.0005         | 4  | 0.0001       |         |          |
| <b>total</b>       | 0.0405         | 12 |              |         |          |

$R^2=0.861$ ; Adj- $R^2=0.762$

(\* $p < 0.05$ , \*\* $p < 0.01$ , and \*\*\* $p < 0.001$ ).

| Source             | Sum of squares | DF | Mean squares | F-value  | Signif.% |
|--------------------|----------------|----|--------------|----------|----------|
| <b>TTA</b>         |                |    |              |          |          |
| <b>Model</b>       | 0.0878         | 5  | 0.0176       | 219.3988 | ***      |
| <b>Residual</b>    | 0.0077         | 7  | 0.0011       |          |          |
| <b>Lack of fit</b> | 0.0073         | 3  | 0.0024       | 30.6142  | **       |
| <b>Pure error</b>  | 0.0003         | 4  | 0.0001       |          |          |
| <b>total</b>       | 0.0954         | 12 |              |          |          |

$R^2=0.920$ ; Adj- $R^2=0.862$

(\* $p < 0.05$ , \*\* $p < 0.01$ , and \*\*\* $p < 0.001$ ).

| Source                 | Sum of squares | DF | Mean squares | F-value  | Signif.% |
|------------------------|----------------|----|--------------|----------|----------|
| <b>TPC (mg GAE/mL)</b> |                |    |              |          |          |
| <b>Model</b>           | 230.2032       | 5  | 46.0406      | 580.3687 | ***      |
| <b>Residual</b>        | 45.4356        | 7  | 6.4908       |          |          |
| <b>Lack of fit</b>     | 45.1183        | 3  | 15.0394      | 189.5807 | ***      |
| <b>Pure error</b>      | 0.3173         | 4  | 0.0793       |          |          |
| <b>total</b>           | 275.6389       | 12 |              |          |          |

$R^2=0.835$ ; Adj- $R^2=0.717$

(\* $p < 0.05$ , \*\* $p < 0.01$ , and \*\*\* $p < 0.001$ ).

| Source                                                             | Sum of squares | DF | Mean squares | F-value | Signif.% |
|--------------------------------------------------------------------|----------------|----|--------------|---------|----------|
| <b>DPPH radical scavenging activity (%)</b>                        |                |    |              |         |          |
| <b>Model</b>                                                       | 210.5275       | 5  | 42.1055      | 57.6211 | **       |
| <b>Residual</b>                                                    | 47.5512        | 7  | 6.7930       |         |          |
| <b>Lack of fit</b>                                                 | 44.6283        | 3  | 14.8761      | 20.3579 | **       |
| <b>Pure error</b>                                                  | 2.9229         | 4  | 0.7307       |         |          |
| <b>total</b>                                                       | 258.0787       | 12 |              |         |          |
| R <sup>2</sup> = 0.816 ; Adj-R <sup>2</sup> =0.684                 |                |    |              |         |          |
| (* <i>p</i> < 0.05, ** <i>p</i> < 0.01, and *** <i>p</i> < 0.001). |                |    |              |         |          |

| Source                                                             | Sum of squares | DF | Mean squares | F-value | Signif.% |
|--------------------------------------------------------------------|----------------|----|--------------|---------|----------|
| <b>OA (5 point hedonic scale)</b>                                  |                |    |              |         |          |
| <b>Model</b>                                                       | 0.6039         | 5  | 0.1208       | 38.8140 | ***      |
| <b>Residual</b>                                                    | 0.0218         | 7  | 0.0031       |         |          |
| <b>Lack of fit</b>                                                 | 0.0069         | 3  | 0.0023       | 0.6132  | 64.3%    |
| <b>Pure error</b>                                                  | 0.0149         | 4  | 0.0037       |         |          |
| <b>total</b>                                                       | 0.6257         | 12 |              |         |          |
| R <sup>2</sup> = 0.965; Adj-R <sup>2</sup> =0.940                  |                |    |              |         |          |
| (* <i>p</i> < 0.05, ** <i>p</i> < 0.01, and *** <i>p</i> < 0.001). |                |    |              |         |          |
