# Supplementary material for: Functional Exploitation of Carob, Oat Flour, and Whey Permeate as Substrates for a Novel Kefir-Like Fermented Beverage: An Optimized Formulation
Source: MDPI journal article supplement (doi:10.3390/foods10020294), 2021-02-01
Supplement: s1 [file s1]

**Table S1.** Mass transitions (MRM) and instrumental parameters optimized for phenolic compounds analyzed by LC-ESI-MS/MS.

| Compound                | Ionization Mode | Precursor ion | Q1             |                      | Q2             |                      | Q2             |                      | RT (min) |
|-------------------------|-----------------|---------------|----------------|----------------------|----------------|----------------------|----------------|----------------------|----------|
|                         |                 |               | Product ion Q1 | Collision energy (V) | Product ion Q2 | Collision energy (V) | Product ion Q2 | Collision energy (V) |          |
| Chlorogenic acid        | -               | 353           | 191            | 20                   |                |                      |                |                      | 5.21     |
| Catechin                | -               | 289           | 203            | 20                   | 123            | 32                   |                |                      | 5.36     |
| Caffeic acid            | -               | 179.1         | 135.1          | 17                   | 134.1          | 28                   | 89.2           | 44                   | 5.54     |
| <i>p</i> -coumaric acid | +               | 165.1         | 119.2          | 16                   | 91.2           | 25                   | 65.3           | 33                   | 6.31     |
| Vanillin                | +               | 153           | 125            | 10                   | 93             | 16                   |                |                      | 6.34     |
| Hyperoside              | -               | 463.2         | 300.1          | 26                   | 271.1          | 21                   |                |                      | 6.87     |
| Ferulic acid            | +               | 195           | 145            | 50                   | 117            | 24                   |                |                      | 6.93     |
| Isoquercetin            | -               | 463.1         | 300            | 42                   | 270.9          | 26                   |                |                      | 6.97     |
| Luteolin                | +               | 287           | 153            | 32                   | 135            | 30                   |                |                      | 9.31     |
